# Supplementary material for: Evaluation of alanine aminotransferase/aspartate aminotransferase ratio and high-density lipoprotein for predicting neonatal adverse outcomes associated with intrahepatic cholestasis of pregnancy
Source: PeerJ journal article supplement (doi:10.7717/peerj.17613), 2024-06-24
Supplement: Sup_1.docx [file Sup_1.docx]

**Sup 1:** **Correlation analysis between total bile acid (TBA) and biochemical indices in pregnant women.**

| Variables | AST | | ALT | | ALT/AST | | HDL | |
| --- | --- | --- | --- | --- | --- | --- | --- | --- |
| *r* | *p* | *r* | *p* | *r* | *p* | *r* | *p* |
| total bile acid (TBA) | 0.451 | 0.000 | 0.381 | 0.000 | 0.180 | 0.003 | -0.187 | 0.009 |

­­
